# Supplementary material for: Comparing crime rates between undocumented immigrants, legal immigrants, and native-born US citizens in Texas
Source: PubMed Central journal article supplement — Proc Natl Acad Sci U S A. 2020 Dec 7;117(51):32340–7. doi: 10.1073/pnas.2014704117 (PMC7768760; doi:10.1073/pnas.2014704117), 2020-12-07
Supplement: pnas.2014704117.sapp.pdf [file pnas.2014704117.sapp.pdf]

## Supporting Information (S.I.)

### Section I. Arrest counts and definitions of detailed crime categories

Table S1. Total arrest counts by group, 2012-2018

| year  | US-born   | Legal Immigrant | Undocumented Immigrant | Total     |
|-------|-----------|-----------------|------------------------|-----------|
| 2012  | 750,812   | 83,378          | 34,145                 | 868,335   |
| 2013  | 747,027   | 80,441          | 32,233                 | 859,701   |
| 2014  | 732,337   | 77,007          | 30,465                 | 839,809   |
| 2015  | 700,229   | 73,663          | 30,430                 | 804,322   |
| 2016  | 705,315   | 75,762          | 28,791                 | 809,868   |
| 2017  | 709,487   | 73,363          | 28,100                 | 810,950   |
| 2018  | 731,689   | 75,798          | 28,888                 | 836,375   |
| Total | 5,076,896 | 539,412         | 213,052                | 5,829,360 |

Table S2. Felony arrest counts by group, 2012-2018

| year  | US-born   | Legal Immigrant | Undocumented Immigrant | Total     |
|-------|-----------|-----------------|------------------------|-----------|
| 2012  | 222,328   | 23,357          | 7,573                  | 253,258   |
| 2013  | 226,482   | 23,149          | 7,299                  | 256,930   |
| 2014  | 229,404   | 22,771          | 6,958                  | 259,133   |
| 2015  | 230,584   | 22,115          | 7,104                  | 259,803   |
| 2016  | 240,120   | 23,624          | 7,035                  | 270,779   |
| 2017  | 250,953   | 23,819          | 7,152                  | 281,924   |
| 2018  | 269,379   | 25,329          | 7,459                  | 302,167   |
| Total | 1,669,250 | 164,164         | 50,580                 | 1,883,994 |

To ensure consistency and comparability, our detailed criminal offenses are categorized using the same arrest codes as those adopted by the DPS in generating the Texas Criminal Illegal Alien reports (*See reference 20 in the article*). The exact offense codes, statutes, citations for the crime categories used in our study are available as a spreadsheet in our replication package. Using the DPS classifications, we report aggregate crime counts that are reassuringly close to those reported in DPS publications.\* The number of total yearly incidents in our data are shown in the following table S3.

\* The aggregate yearly arrest counts in our data have a correlation of 0.99 with the aggregate yearly arrest counts reported by the DPS in their annual Compliance Reports. See [https://www.dps.texas.gov/administration/crime\\_records/pages/crimHistoryRptng.htm](https://www.dps.texas.gov/administration/crime_records/pages/crimHistoryRptng.htm)

Table S3. Total yearly detailed arrests Texas, 2012-2018

| Crime Categories   | 2012    | 2013    | 2014    | 2015    | 2016    | 2017    | 2018    | Category Total |
|--------------------|---------|---------|---------|---------|---------|---------|---------|----------------|
| Homicide           | 1,261   | 1,216   | 1,197   | 1,309   | 1,373   | 1,442   | 1,384   | 9,182          |
| Assault            | 99,527  | 97,934  | 96,056  | 97,488  | 97,334  | 99,162  | 106,213 | 693,714        |
| Robbery            | 7,427   | 7,456   | 7,270   | 7,261   | 7,581   | 7,546   | 7,178   | 51,719         |
| Sexual Assault     | 5,447   | 5,327   | 5,189   | 5,299   | 5,371   | 5,718   | 6,033   | 38,384         |
| Burglary           | 27,582  | 26,229  | 24,234  | 21,573  | 22,538  | 21,478  | 20,109  | 163,743        |
| Theft              | 101,356 | 102,822 | 101,928 | 89,893  | 69,211  | 61,752  | 61,111  | 588,073        |
| Arson              | 625     | 536     | 591     | 611     | 576     | 626     | 639     | 4,204          |
| Drugs              | 170,647 | 175,325 | 181,014 | 178,284 | 199,173 | 207,774 | 217,269 | 1,329,486      |
| Traffic            | 155,842 | 149,834 | 144,799 | 138,932 | 140,424 | 141,859 | 148,282 | 1,019,972      |
| Weapons            | 15,172  | 15,456  | 15,164  | 16,840  | 19,567  | 21,600  | 22,450  | 126,249        |
| Sexual Offenses    | 11,820  | 11,625  | 10,841  | 10,823  | 10,461  | 10,374  | 9,743   | 75,687         |
| Obstructing Police | 59,524  | 59,127  | 57,333  | 56,443  | 59,158  | 60,427  | 61,988  | 414,000        |
| Kidnapping         | 554     | 561     | 598     | 515     | 517     | 738     | 1,495   | 4,978          |
| All Others         | 225,347 | 218,946 | 204,823 | 189,383 | 186,476 | 180,185 | 181,676 | 1,386,836      |
| Year total         | 882,131 | 872,394 | 851,037 | 814,654 | 819,760 | 820,681 | 845,570 | 5,906,227      |

Since our analysis is focused on felonies, we further rely on the severity level of the offense in CCH to indicate felony offenses. Specifically, we include capital felonies, 1<sup>st</sup> degree felonies, 2<sup>nd</sup> degree felonies, 3<sup>rd</sup> degree felonies, state jail felonies, and unclassified felonies. The felony incidences of these detailed categories are shown in Table S4.

Table S4. Total yearly detailed felony arrests in Texas, 2012-2018

| Crime Categories   | 2012    | 2013    | 2014    | 2015    | 2016    | 2017    | 2018    | Category Total |
|--------------------|---------|---------|---------|---------|---------|---------|---------|----------------|
| Homicide           | 1,261   | 1,216   | 1,197   | 1,305   | 1,367   | 1,440   | 1,383   | 9,169          |
| Assault            | 40,175  | 40,612  | 40,257  | 41,865  | 42,869  | 43,881  | 47,778  | 297,437        |
| Robbery            | 7,304   | 7,456   | 7,267   | 7,257   | 7,577   | 7,545   | 7,175   | 51,581         |
| Sexual Assault     | 5,447   | 5,327   | 5,188   | 5,296   | 5,370   | 5,716   | 6,032   | 38,376         |
| Burglary           | 19,023  | 18,724  | 17,217  | 15,092  | 15,166  | 14,390  | 13,643  | 113,255        |
| Theft              | 25,945  | 27,575  | 27,864  | 26,425  | 23,007  | 22,225  | 22,984  | 176,025        |
| Arson              | 621     | 534     | 588     | 608     | 573     | 624     | 638     | 4,186          |
| Drugs              | 73,903  | 77,052  | 81,071  | 81,064  | 90,486  | 98,928  | 107,636 | 610,140        |
| Traffic            | 19,446  | 18,385  | 17,884  | 18,018  | 19,202  | 19,593  | 20,754  | 133,282        |
| Weapons            | 6,748   | 6,685   | 6,727   | 7,238   | 7,867   | 8,673   | 8,747   | 52,685         |
| Sexual Offenses    | 6,465   | 6,025   | 5,903   | 5,834   | 5,747   | 5,609   | 5,465   | 41,048         |
| Obstructing Police | 12,441  | 12,793  | 13,507  | 14,274  | 15,359  | 16,524  | 17,567  | 102,465        |
| Kidnapping         | 553     | 561     | 597     | 515     | 513     | 591     | 662     | 3,992          |
| All Others         | 37,419  | 36,739  | 36,551  | 37,481  | 37,931  | 38,504  | 43,402  | 268,027        |
| Year total         | 256,751 | 259,684 | 261,818 | 262,272 | 273,034 | 284,243 | 303,866 | 1,901,668      |

Section II. Trends of detailed crime categories

In this section, we examine the trends for the detailed crime categories listed in Table S4. Figure S1 shows that undocumented immigrants are consistently less likely to be arrested for homicides compared to US-born citizens and legal immigrants throughout 2012 to 2018. Similarly, undocumented immigrant crimes rates of assault (S2), robbery (S3), sexual assault (S4), burglary (S5), theft (S6) and arson (S7) are remarkably stable and remain the lowest among the three groups. In general, there is no evidence that undocumented immigrants are likely to be arrested for any detailed categories of violent and property crimes compared to either native citizens or legal immigrants in any year from 2012 to 2018.

Figure S1. Trends of homicide crime rates by citizens, legal immigrants and undocumented immigrants

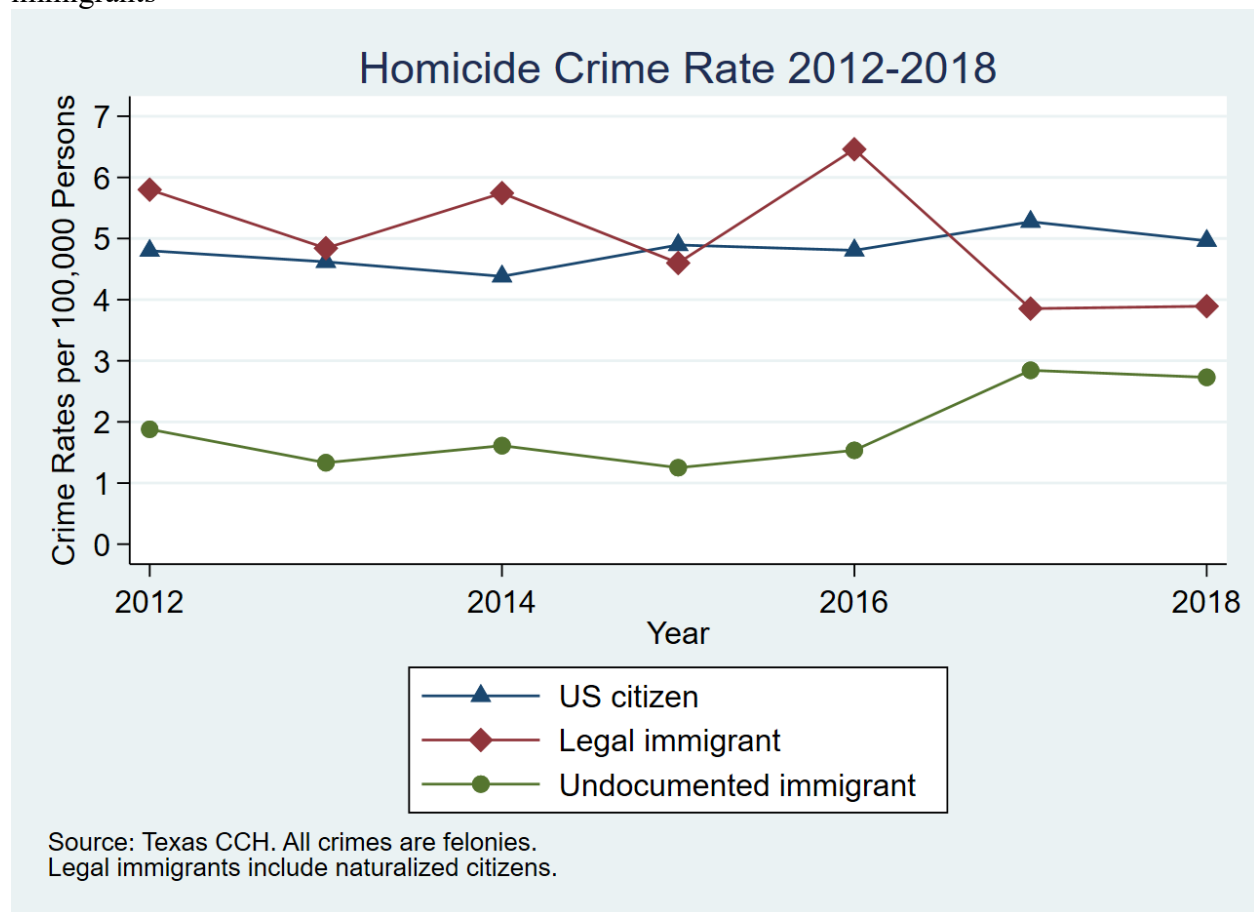

Figure S2. Trends of assault crime rates by citizens, legal immigrants and undocumented immigrants

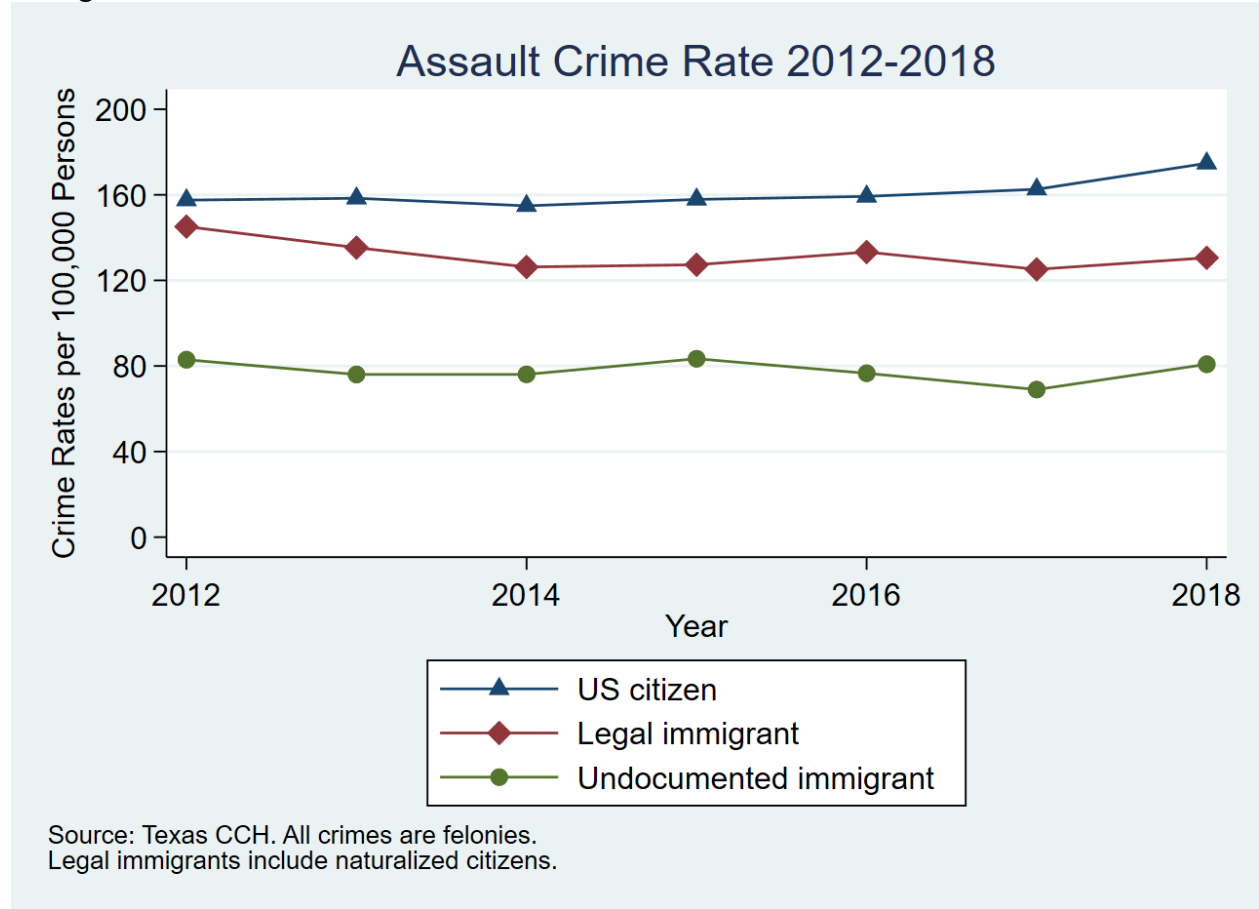

Figure S3. Trends of robbery crime rates by citizens, legal immigrants and undocumented immigrants

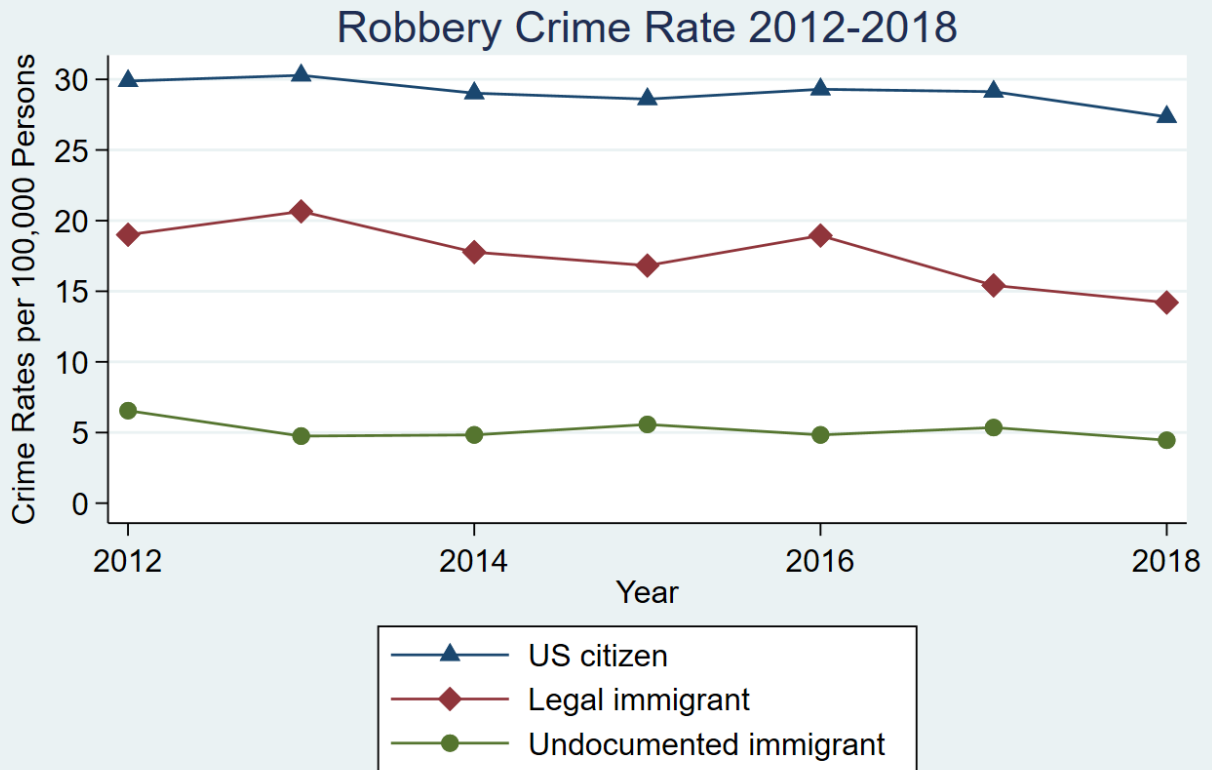

Source: Texas CCH. All crimes are felonies.  
Legal immigrants include naturalized citizens.

Figure S4. Trends of sexual assault crime rates by citizens, legal immigrants and undocumented immigrants

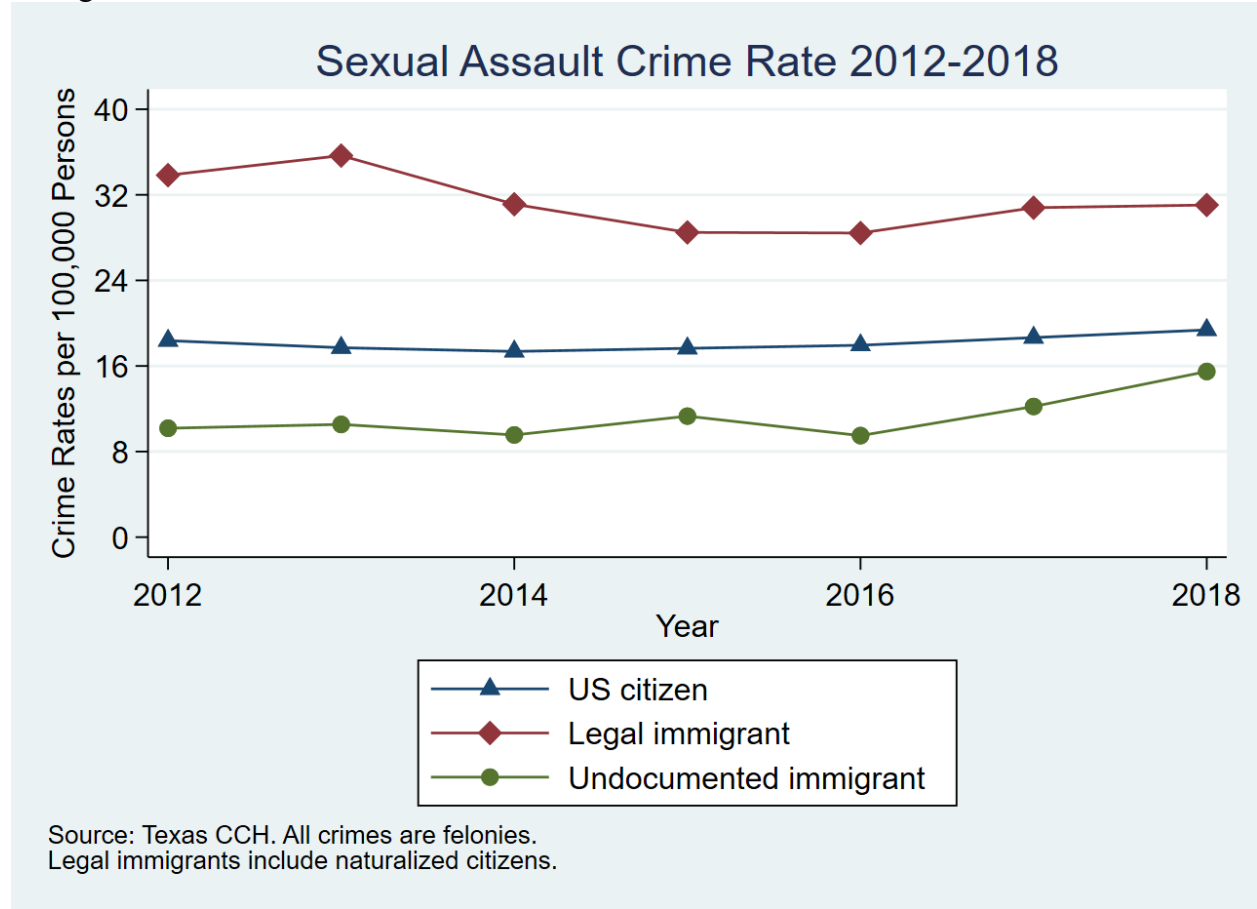

Figure S5. Trends of burglary crime rates by citizens, legal immigrants and undocumented immigrants

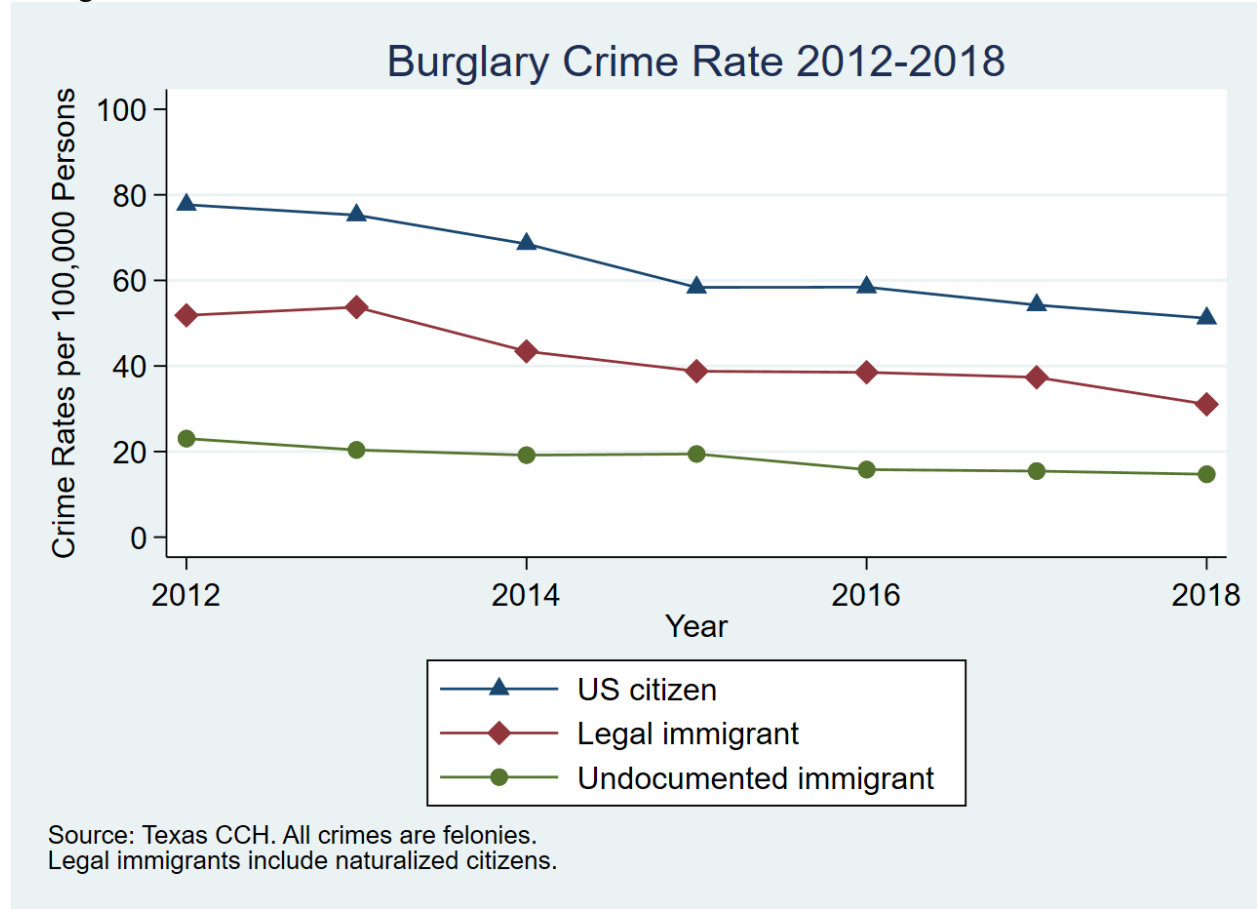

Figure S6. Trends of theft crime rates by citizens, legal immigrants and undocumented immigrants

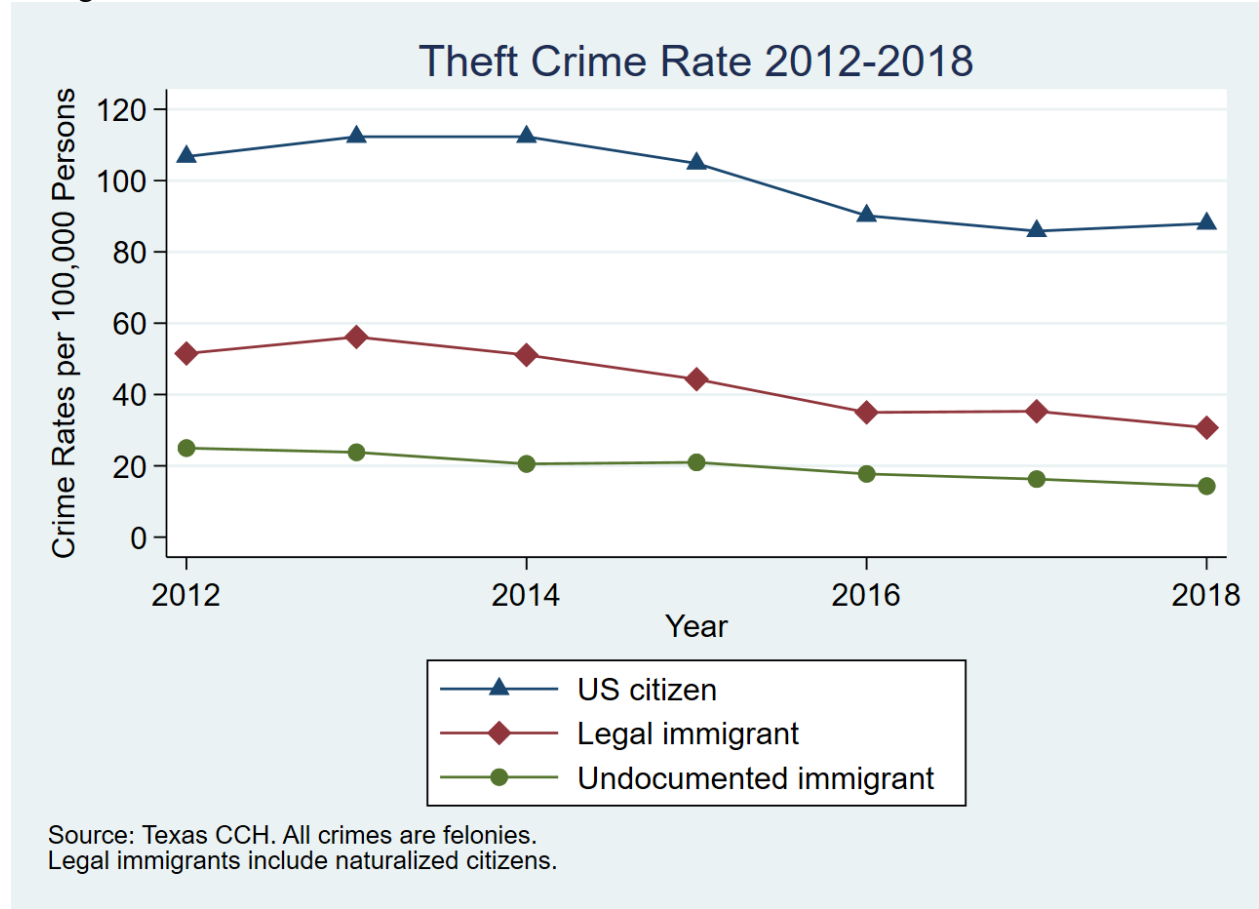



Figure S7. Trends of arson crime rates by citizens, legal immigrants and undocumented immigrants

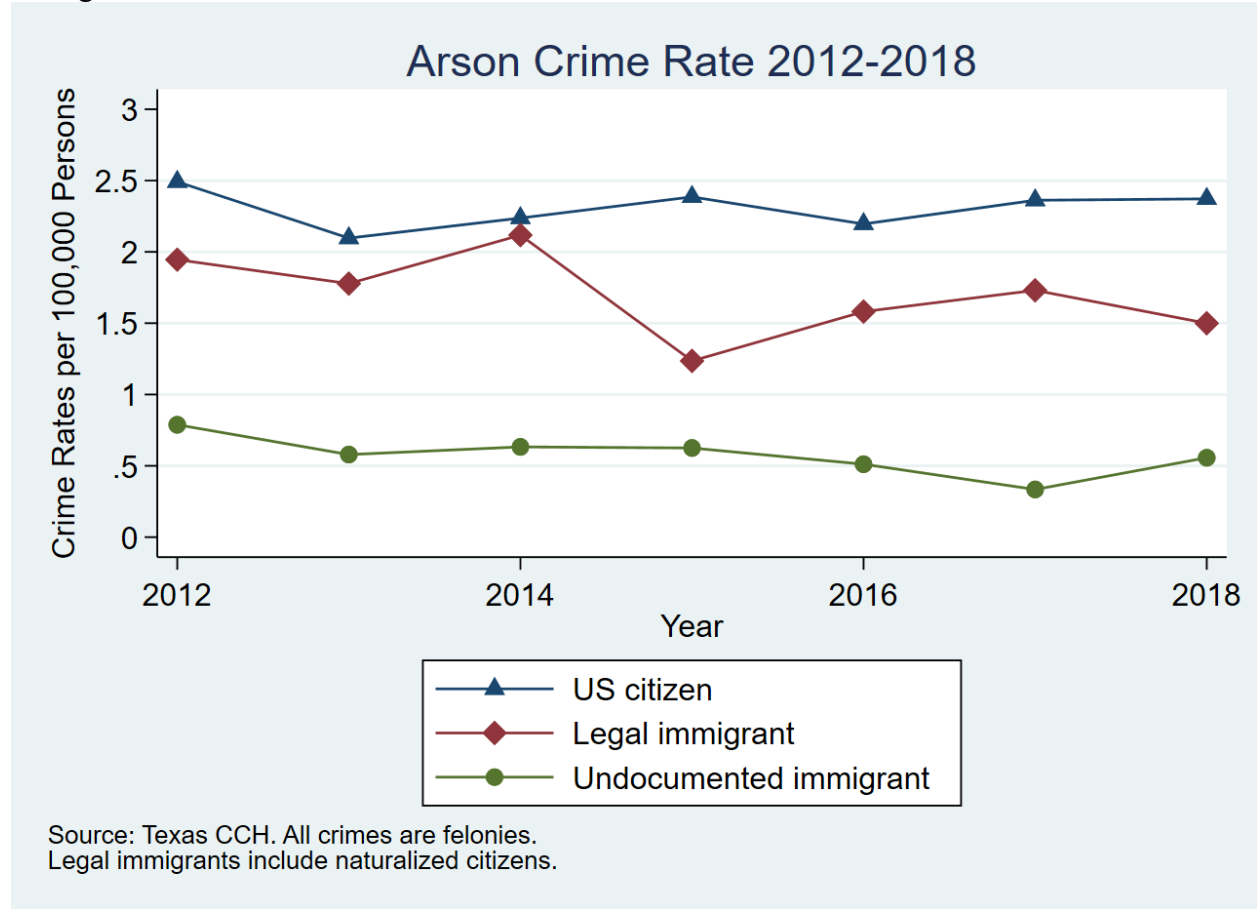

Figure S8. Trends of weapons crime rates by citizens, legal immigrants and undocumented immigrants

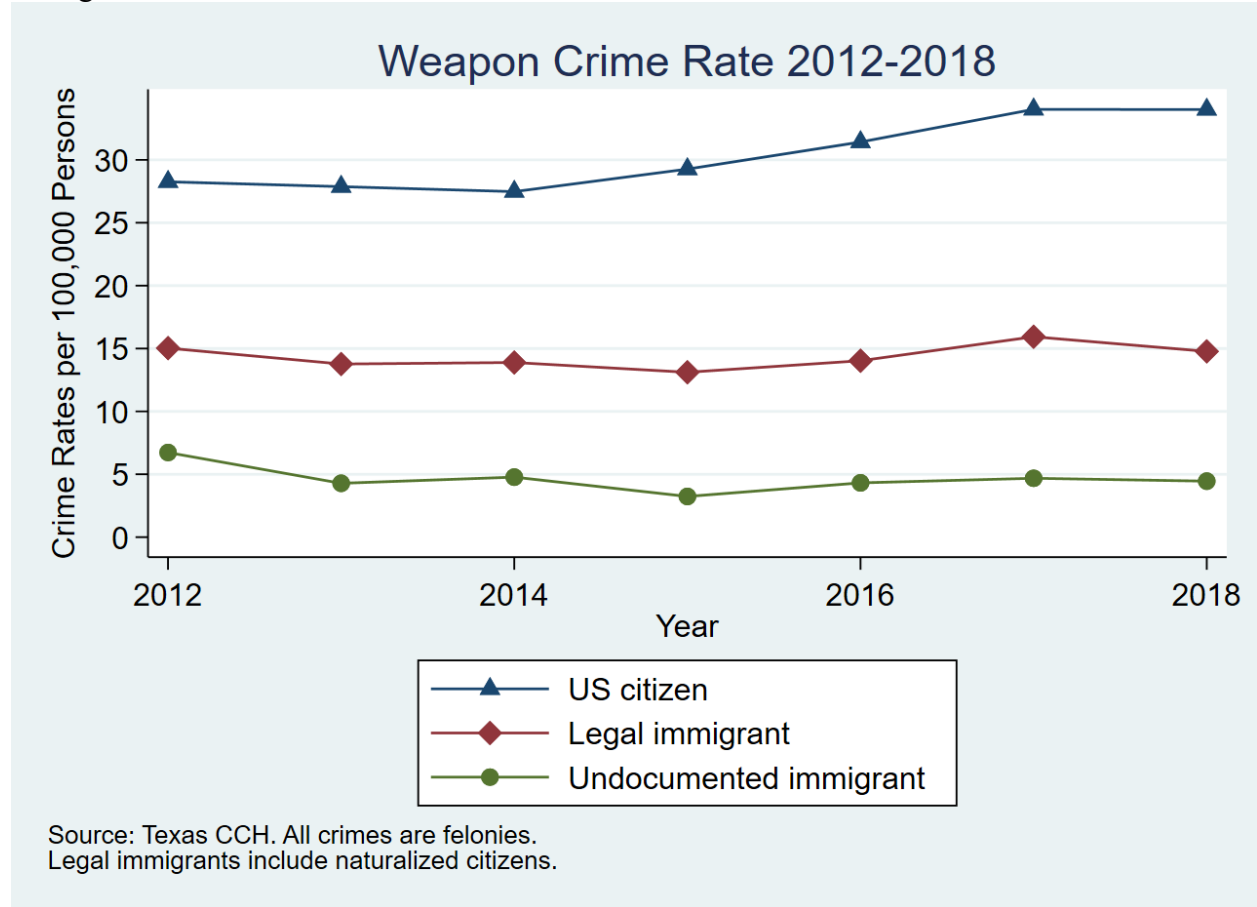

Figure S9. Trends of sexual offense crime rates by citizens, legal immigrants and undocumented immigrants

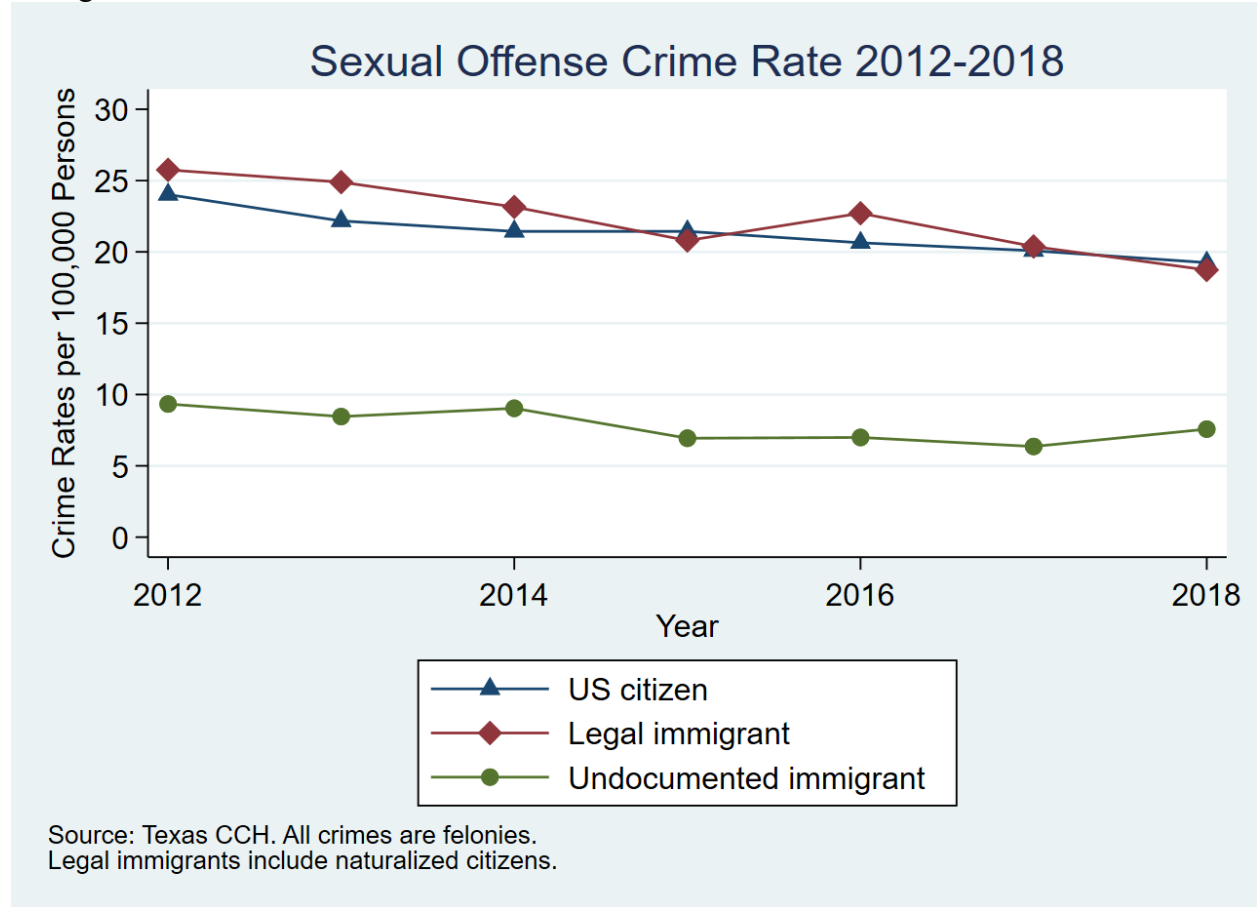

Figure S10. Trends of obstructing police crime rates by citizens, legal immigrants and undocumented immigrants

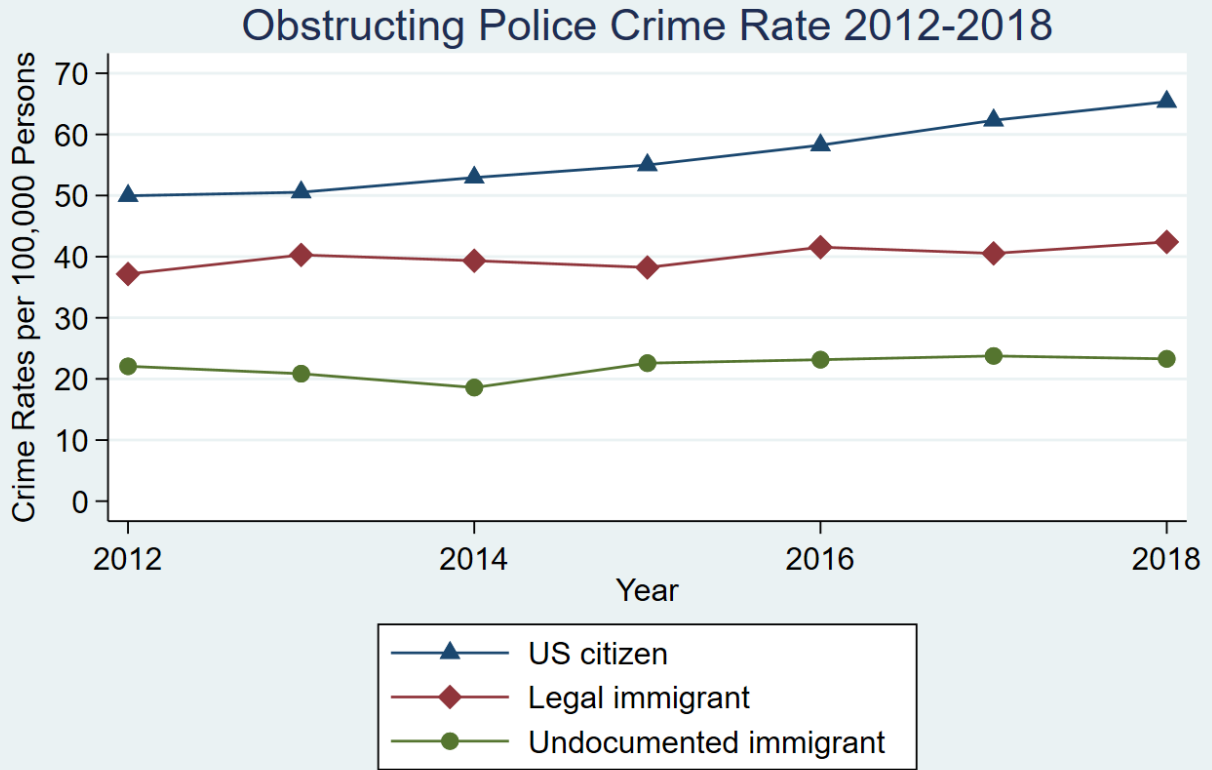

Source: Texas CCH. All crimes are felonies.  
Legal immigrants include naturalized citizens.

Figure S11. Trends of kidnapping crime rates by citizens, legal immigrants and undocumented immigrants

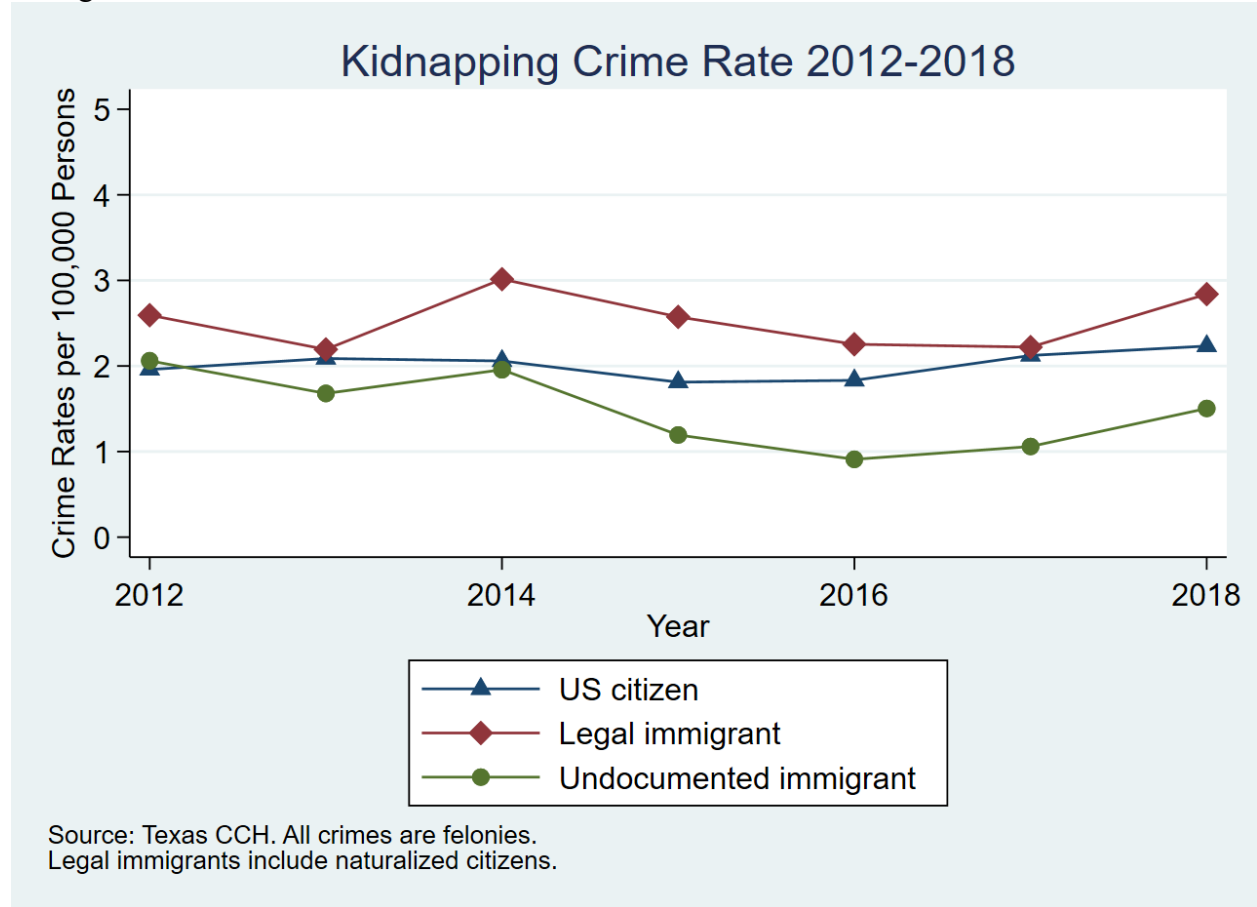

Figure S12. Trends of other felony offenses crime rates by citizens, legal immigrants and undocumented immigrants

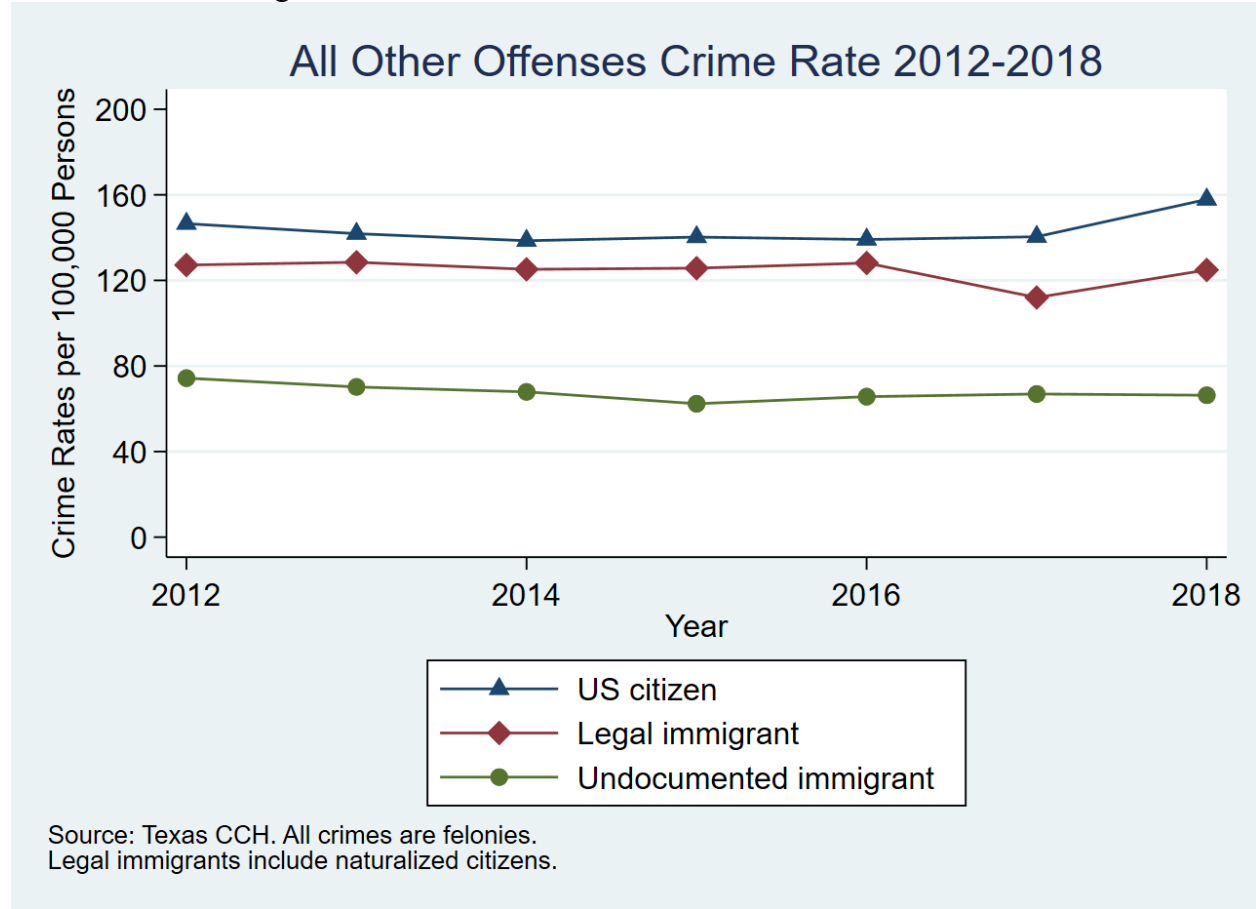

Section III. Robustness check using the estimates of undocumented population from the Pew Research Center

Similar to CMS, Pew provides yearly estimates of the size of the undocumented immigrant population. The population estimates by Pew are slightly smaller compared to CMS. Between 2012 and 2017, the Pew estimates were 6.4 percent smaller on average. Table S3 reports the undocumented estimates in Texas according to the Pew and CMS from 2012 to 2018 (2017 is the most current data available from Pew).

Table S5. Estimates of Undocumented Immigrants Population in Texas by Pew and CMS

| <u>Year</u> | <u>Pew Estimates</u> | <u>CMS<br/>Estimates</u> |
|-------------|----------------------|--------------------------|
| 2012        | 1650000              | 1649000                  |
| 2013        | 1650000              | 1726000                  |
| 2014        | 1650000              | 1737000                  |
| 2015        | 1650000              | 1758200                  |
| 2016        | 1600000              | 1758300                  |
| 2017        | 1600000              | 1792600                  |
| 2018        | Unavailable          | 1794800                  |

To triangulate our analysis, we used the Pew estimates of the undocumented immigrant population as denominators to calculate the aggregated crime rates. The results are very similar to the results with CMS estimates as presented in the main text. Here, we show the crime rates from 2012 to 2017 by violent, property, drug and traffic felonies, as well as by detailed violent and property crime types. Crime trend plots are available in the replication package.

Figure S13. Total aggregated crime rates, replication with Pew estimates as denominators

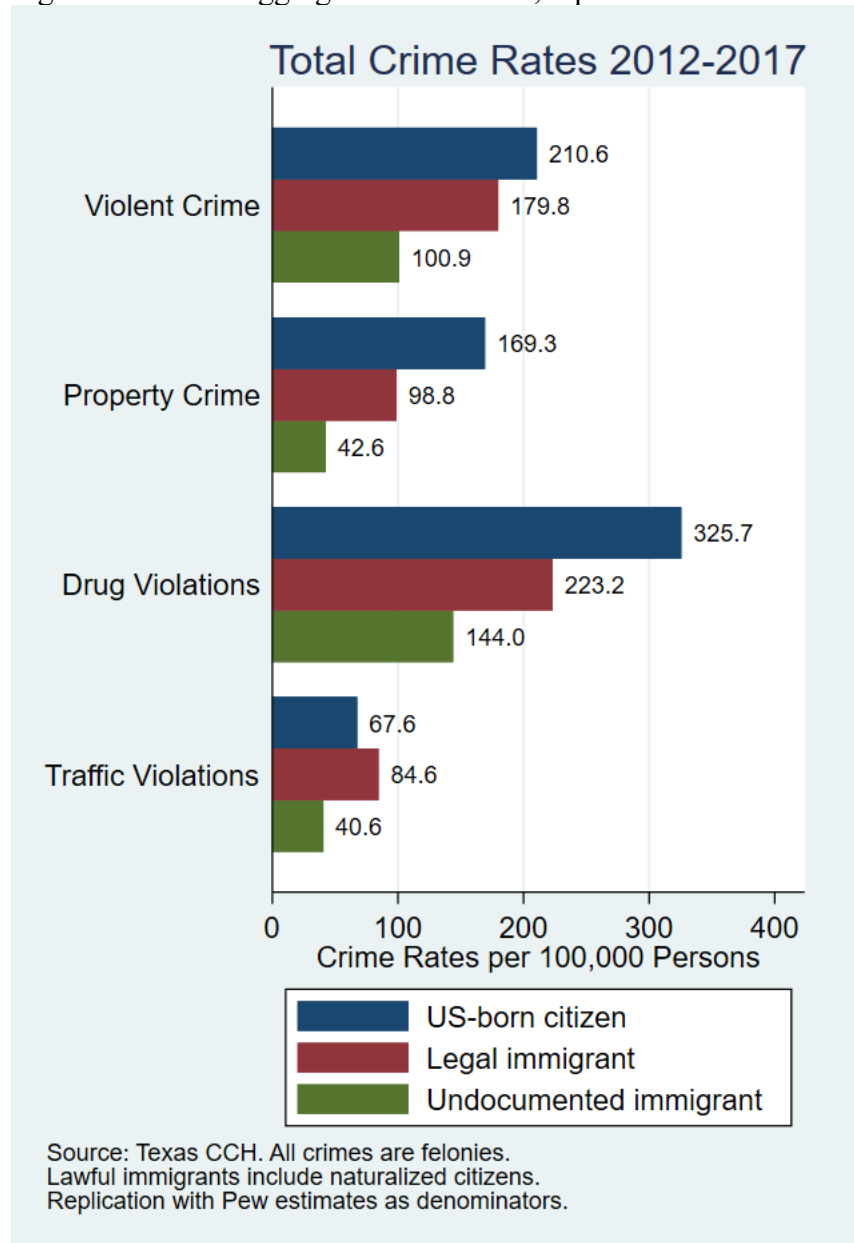



Figure S14. Total aggregated rates by detailed categories of violent crime and property crime, replication with Pew estimates as denominators

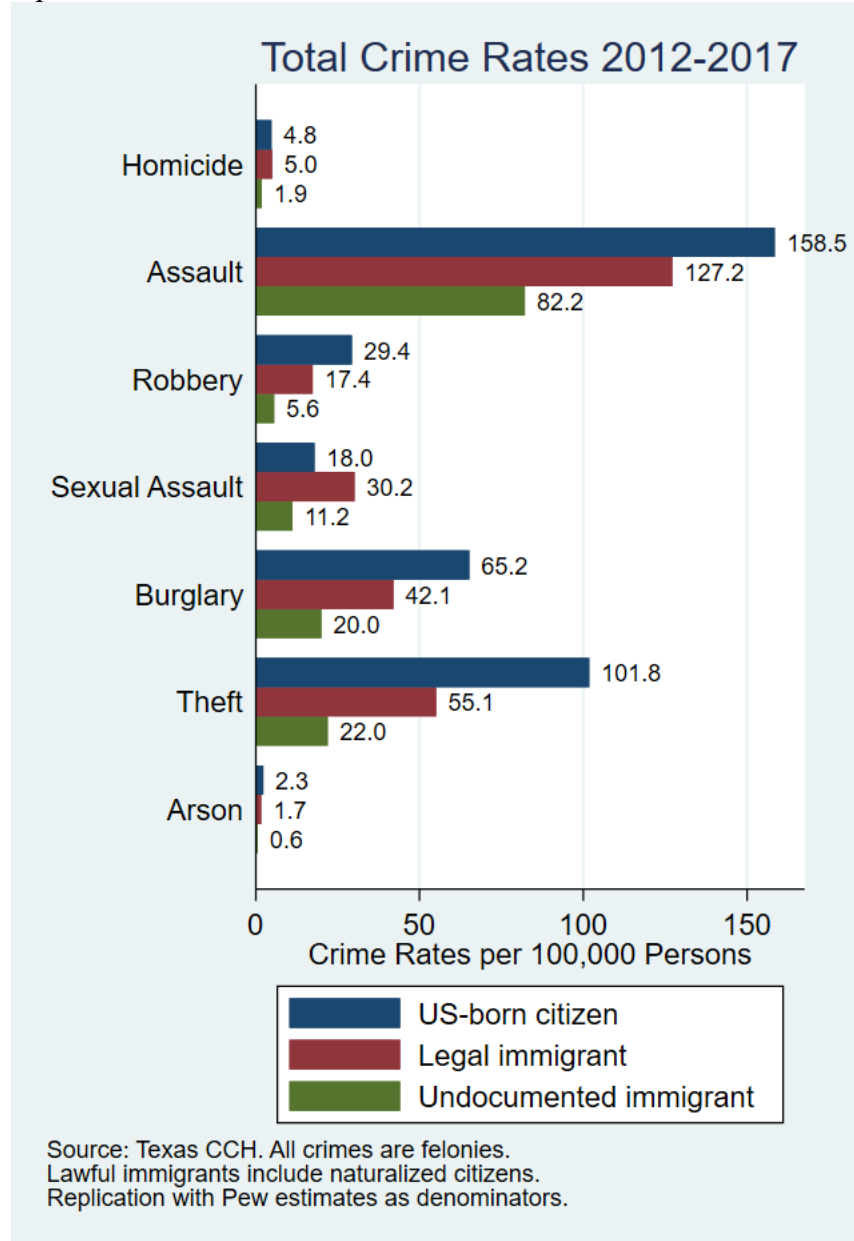

Section IV. Replication with conviction rates

In this section, we replicate the main crime rate comparison using conviction data. A potential concern with using arrest charges as an indicator of crime would be if one group is more likely to be arrested regardless of the amount of underlying criminality. Attempting to correct for differential contact, we followed every felony arrest charge through its criminal case processing to determine whether it resulted in any conviction or deferred adjudication. When using conviction rates, the overall crime rates will necessarily decrease because most arrest charges do not result in a conviction. Comparing the conviction rates in Figures S15 and S16 to the arrest rates in Figures 1 and 2 in the main text, it is clear that the conviction data yields substantively identical results. Across all crime categories, the conviction rates for undocumented immigrants are substantially smaller than the conviction rates for US-born citizens.

Figure S15. Total aggregated conviction rates

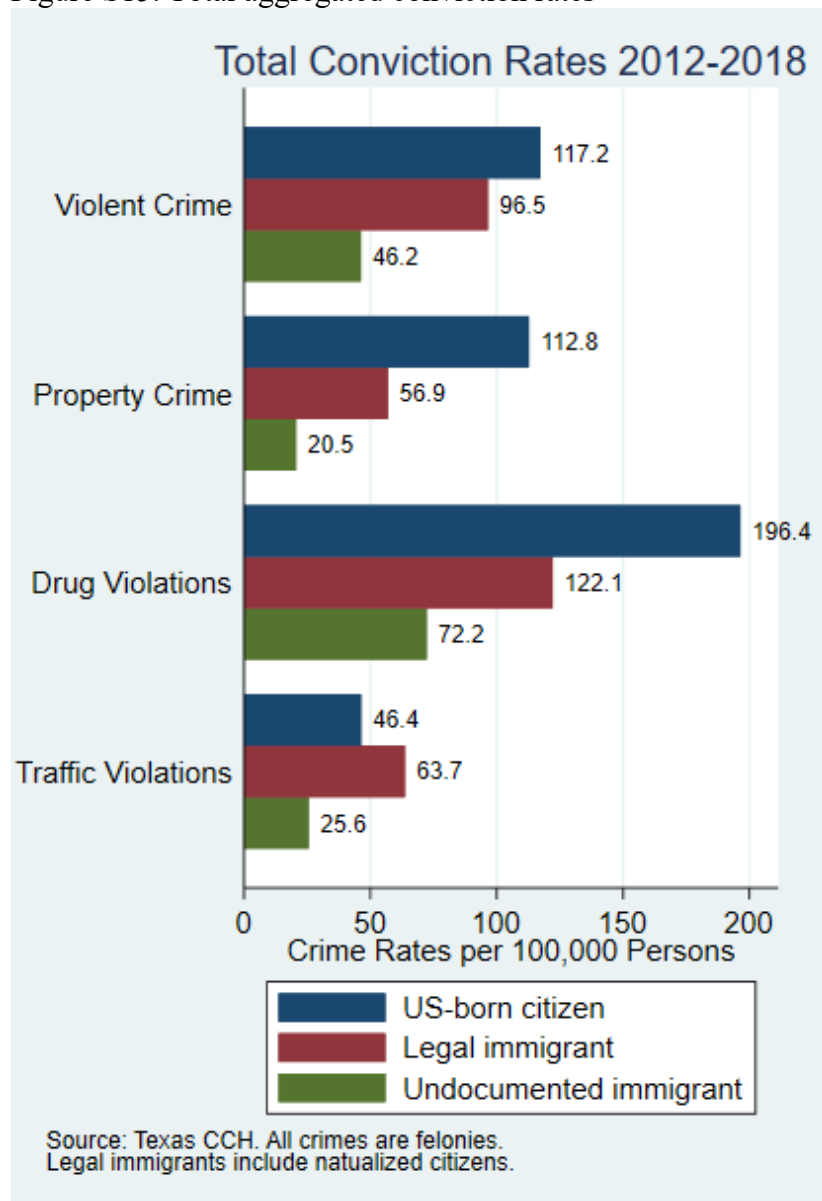

Figure S16. Total aggregated conviction rates by detailed categories of violent crime and property crime

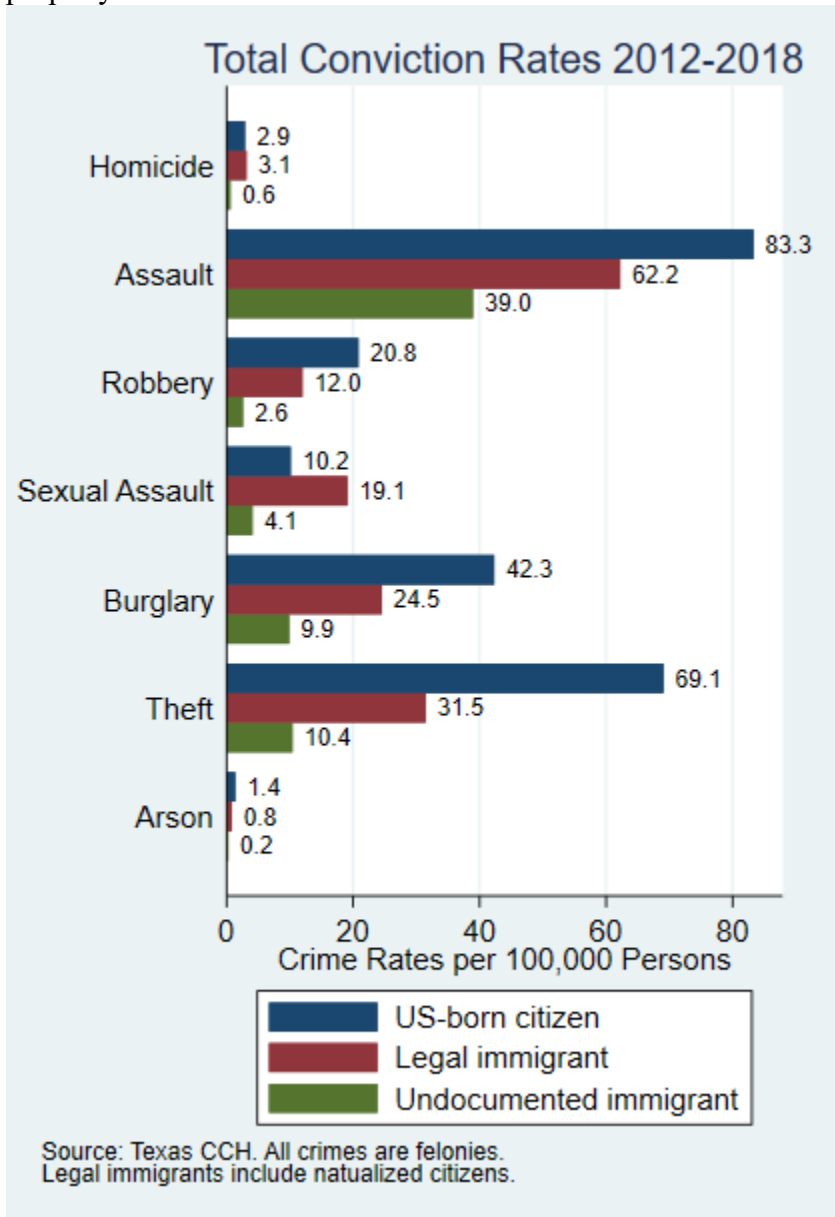

Section V. Detailed results of linear trend and ADF tests

This section presents the full statistical results from linear trend tests and the ADF tests of the monthly data from 2012 to 2018. Table 1 in the manuscript summarizes the coefficients of the month indicator ( $t$ ) from Table S6 and the rows for “Trend” in Table S7, where the suffixes indicate the number of lagged terms included.

Table S6. Linear trend tests of the percentage of undocumented immigrant arrest

|                         | Total felony         | Violent             | Property            | Drug                 | Traffic              |
|-------------------------|----------------------|---------------------|---------------------|----------------------|----------------------|
| Month Indicator ( $t$ ) | -0.002***<br>(-7.51) | -0.001<br>(-1.80)   | -0.002**<br>(-2.92) | -0.004***<br>(-7.91) | -0.003***<br>(-4.73) |
| Constant                | 1.066***<br>(70.64)  | 1.116***<br>(49.14) | 0.550***<br>(14.31) | 1.173***<br>(47.86)  | 1.379***<br>(38.53)  |
| N                       | 84                   | 84                  | 84                  | 84                   | 84                   |

Notes:  $t$  statistics in parentheses  
 $^* p < 0.05$ ,  $^{**} p < 0.01$ ,  $^{***} p < 0.001$

Table S7. ADF tests of the log transformed percentage of undocumented immigrant arrests

|                                | Total felony       | Violent              | Property             | Drug               | Traffic              |
|--------------------------------|--------------------|----------------------|----------------------|--------------------|----------------------|
| L. (ln) Percent Undocumented   | -0.956*<br>(-2.64) | -0.845***<br>(-7.39) | -0.965***<br>(-8.44) | -0.776<br>(-2.81)  | -0.775***<br>(-5.10) |
| LD. (ln) Percent Undocumented  | -0.058<br>(-0.18)  |                      |                      | -0.245<br>(-0.99)  | -0.013<br>(-0.11)    |
| L2D. (ln) Percent Undocumented | -0.026<br>(-0.10)  |                      |                      | -0.141<br>(-0.69)  |                      |
| L3D. (ln) Percent Undocumented | -0.012<br>(-0.07)  |                      |                      | 0.036<br>(0.23)    |                      |
| Trend                          | -0.002<br>(-1.98)  | -0.001<br>(-1.59)    | -0.002*<br>(-2.30)   | -0.003*<br>(-2.52) | -0.003**<br>(-2.77)  |
| Constant                       | 1.014*<br>(2.58)   | 0.949***<br>(7.26)   | 0.515***<br>(6.88)   | 0.927**<br>(2.82)  | 1.077***<br>(4.95)   |
| N                              | 56                 | 77                   | 77                   | 56                 | 70                   |

Notes:  $t$  statistics in parentheses\*  $p < 0.05$ , \*\*  $p < 0.01$ , \*\*\*  $p < 0.001$

The augmented Dickey-Fuller (ADF) test fits this model:  $\Delta y_t = \alpha + \beta y_{t-1} + \sigma t + \phi_1 \Delta y_{t-1} + \phi_2 \Delta y_{t-2} + \dots + \phi_k \Delta y_{t-k} + \epsilon_t$ . The coefficient of (ln) Percent Undocumented corresponds to the estimate of  $\beta$  in the equation, which reflects whether the time series follows a unit root (random walk) process (the null hypothesis), or stationary process (the alternative hypothesis) after accounting for trends and autocorrelations. LD. (ln) Percent Undocumented, L2D. (ln) Percent Undocumented and L3D. (ln) Percent Undocumented correspond to  $\phi_1, \phi_2$  and  $\phi_3$ , which are the coefficients of the lag terms. The sample sizes differ across models because of the different number of lag terms included. For the stationarity test, the 5% critical Z(t) values are -3.494 (N=56), -3.473 (N=77) and -3.480 (N=70), and the test results can be learnt by comparing the t statistics in parentheses with the corresponding Z(t) values. To evaluate the decrease or increase of the time-series, we rely on the coefficient of the variable Trend, which corresponds to  $\sigma$  in the equation.

## Section VI. Misdemeanors

Relative to felonies, misdemeanor arrests are a far more common form of criminal justice contact. In addition, they now play a critical role in immigration enforcement. In 2011, for example, 29 percent of those deported through the Secure Communities program after a local arrest were convicted of only misdemeanors.<sup>†</sup> For these reasons, it is important to consider whether misdemeanor arrests alter the picture of undocumented criminality. By law, local officials must report all Class A and B misdemeanors to the CCH. Class C misdemeanors, which are punishable by a fine only (up to \$500), are not mandatorily reported. Many Class C misdemeanors, however, are voluntarily reported. Over our study period, 3,312,812 Class A and B misdemeanor arrest charges and 694,182 Class C misdemeanor arrest charges were reported in the CCH. Given these reporting distinctions, we examine misdemeanor arrests in three different ways. First, Figure S17 reports arrest rates for all Class A and B misdemeanors from 2012 to 2018 for native-born citizens, legal immigrants, and undocumented immigrants. Figure S18 reports all misdemeanor arrests (including Class Cs) for each group. And Figure S19 reports arrest rates for all felonies and misdemeanors combined. Two findings stand out. First, unsurprisingly, misdemeanor arrest rates are substantially higher for each group (compare to Figure 3 in the main text). Second, the relative comparisons between native-born citizens, legal immigrants, and undocumented immigrants in misdemeanor arrests largely mirror those for felony arrests. That is, native-citizens have the highest misdemeanor arrest rates (variously defined), undocumented immigrants have the lowest rates, and legal immigrants fall in between. Moreover, the gap between undocumented immigrants and native citizens for all misdemeanor comparisons is substantial. Combined, regardless of whether one focuses on misdemeanors or felonies, the evidence consistently suggests undocumented immigrants have lower arrest rates than legal immigrants and native-born U.S. citizens in Texas.

---

<sup>†</sup> See Waslin, Michele. 2011. *The Secure Communities Program: Unanswered Questions and Continuing Concerns*. American Immigration Council. Washington DC.

Figure S17. Trends of Class A and B misdemeanors crime rates by citizens, legal immigrants and undocumented immigrants

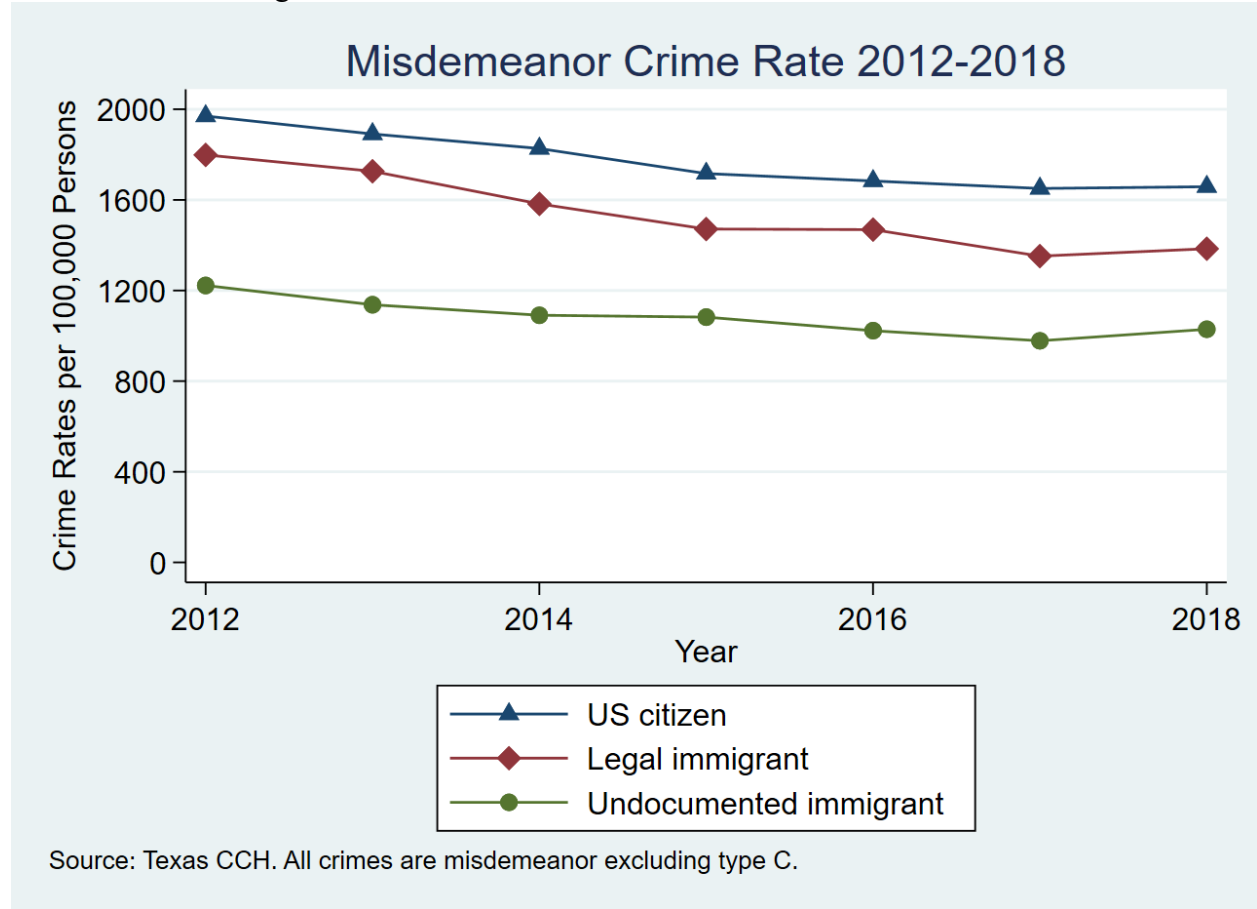

Figure S18. Trends of all misdemeanors crime rates (including Class Cs) by citizens, legal immigrants and undocumented immigrants

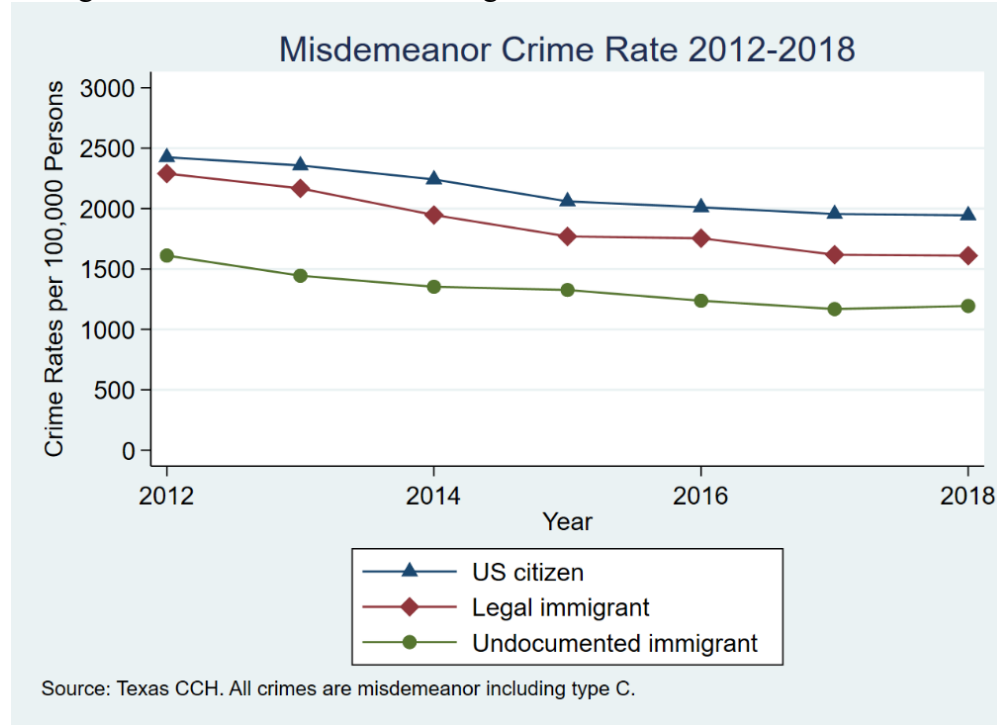

Figure S19. Trends of all felonies and misdemeanors crime rates by citizens, legal immigrants and undocumented immigrants

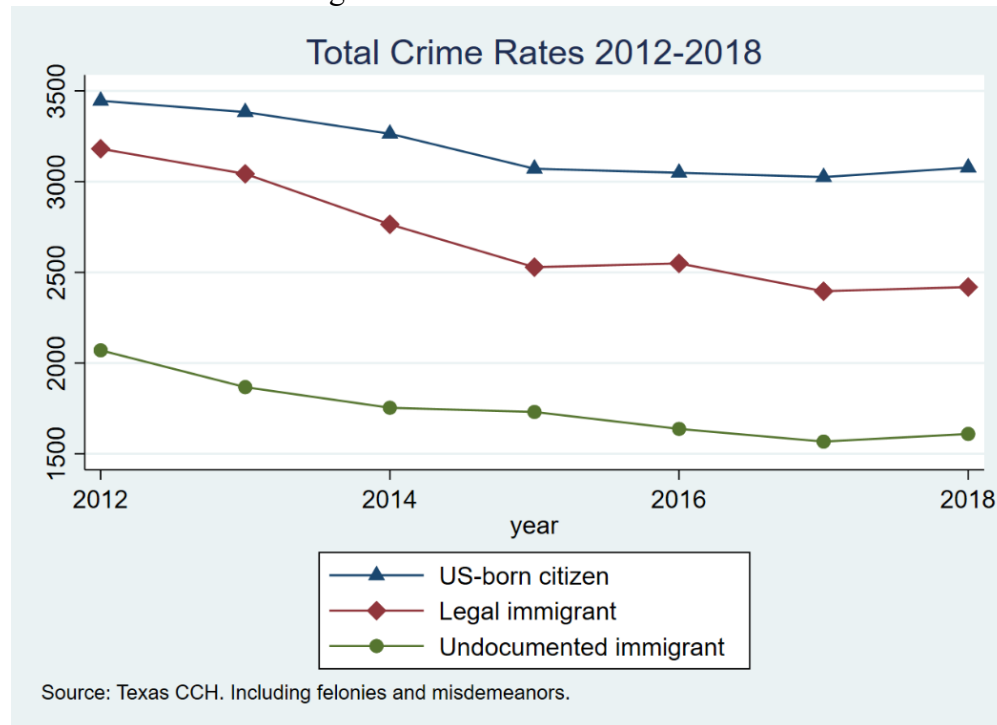

Section VII. *Naturalized U.S. Citizens*

Legal immigration can be understood as a formal selection process whereby applicants are vetted based on requirements articulated in immigration law. In the case of naturalized citizens, this process involves selection on both residency requirements and a lack of serious criminality. For these reasons, it may be important to consider this group separately from other legal immigrants. We do so in Figures S20-S24 where we report the trends in total, violent, property, drug, and traffic felony arrests between 2012 and 2018 for four distinct groups: native-born U.S. citizens, naturalized U.S. citizens, other legal immigrants, and undocumented immigrants. Though not identical in all cases, the general pattern observed in these figures suggests that felony arrests rates for naturalized citizens are relatively comparable to other legal immigrants.

Figure S20. Trends of total felonies crime rates by native-born U.S. citizens, naturalized U.S. citizens, legal immigrants and undocumented immigrants

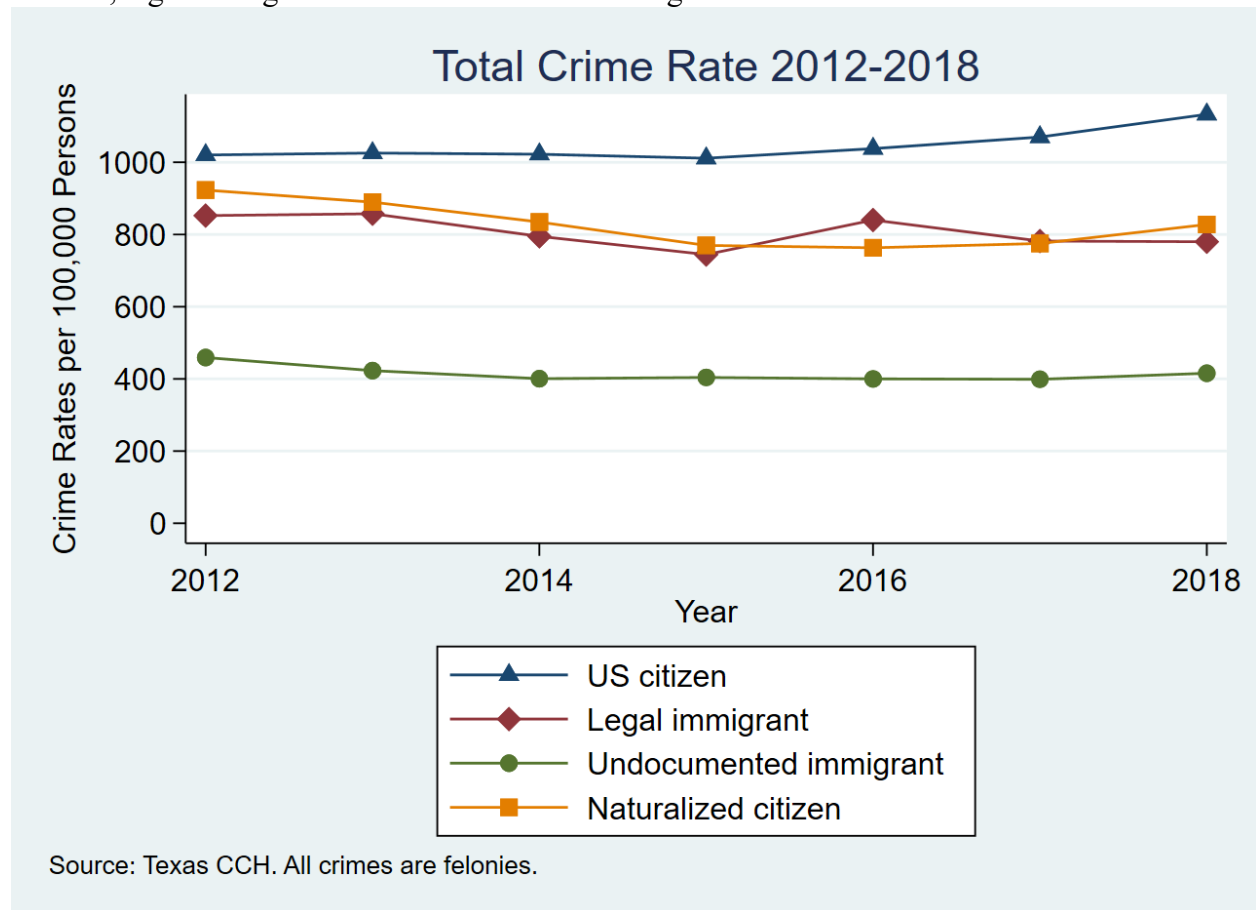



Figure S21. Trends of violent crime rates by native-born U.S. citizens, naturalized U.S. citizens, legal immigrants and undocumented immigrants

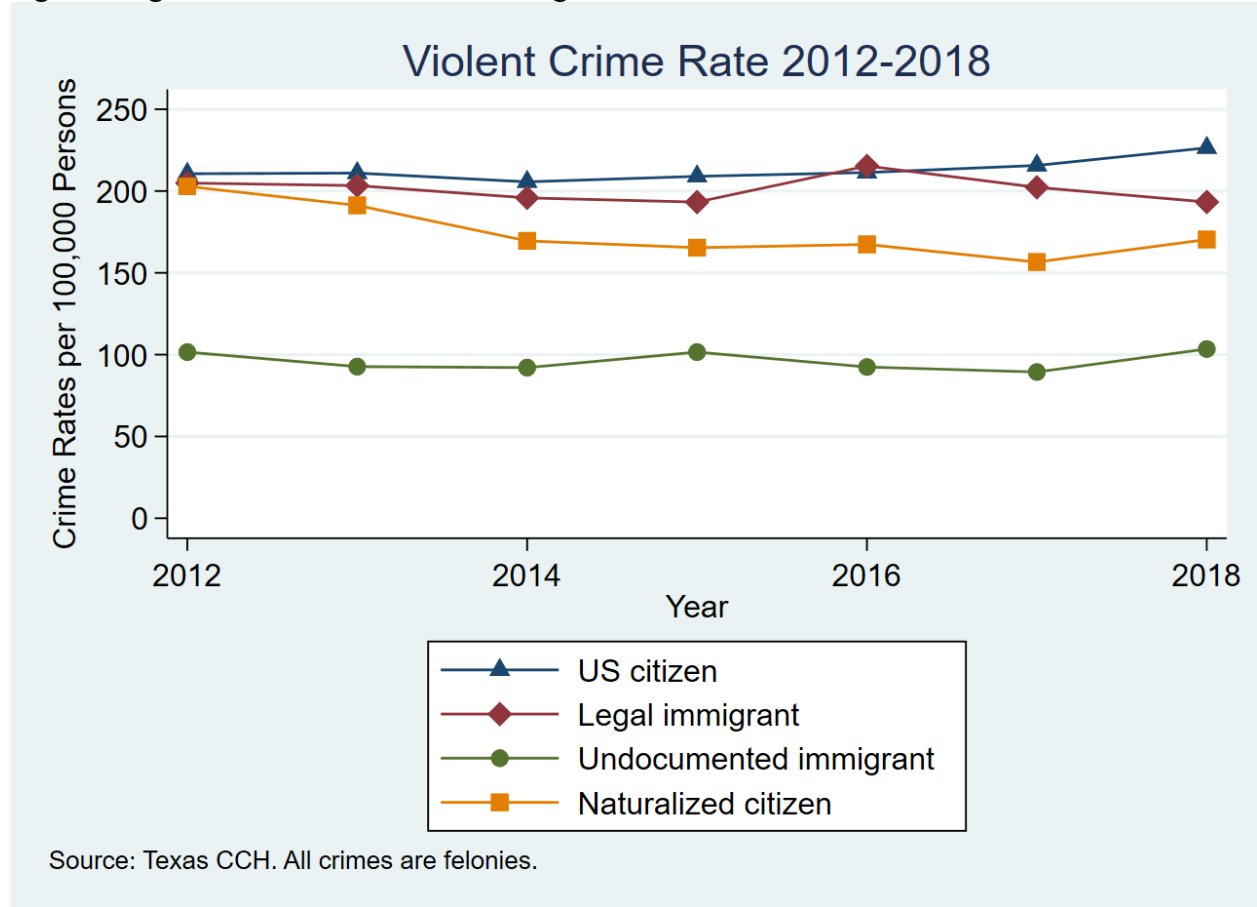

Figure S22. Trends of property crime rates by native-born U.S. citizens, naturalized U.S. citizens, legal immigrants and undocumented immigrants

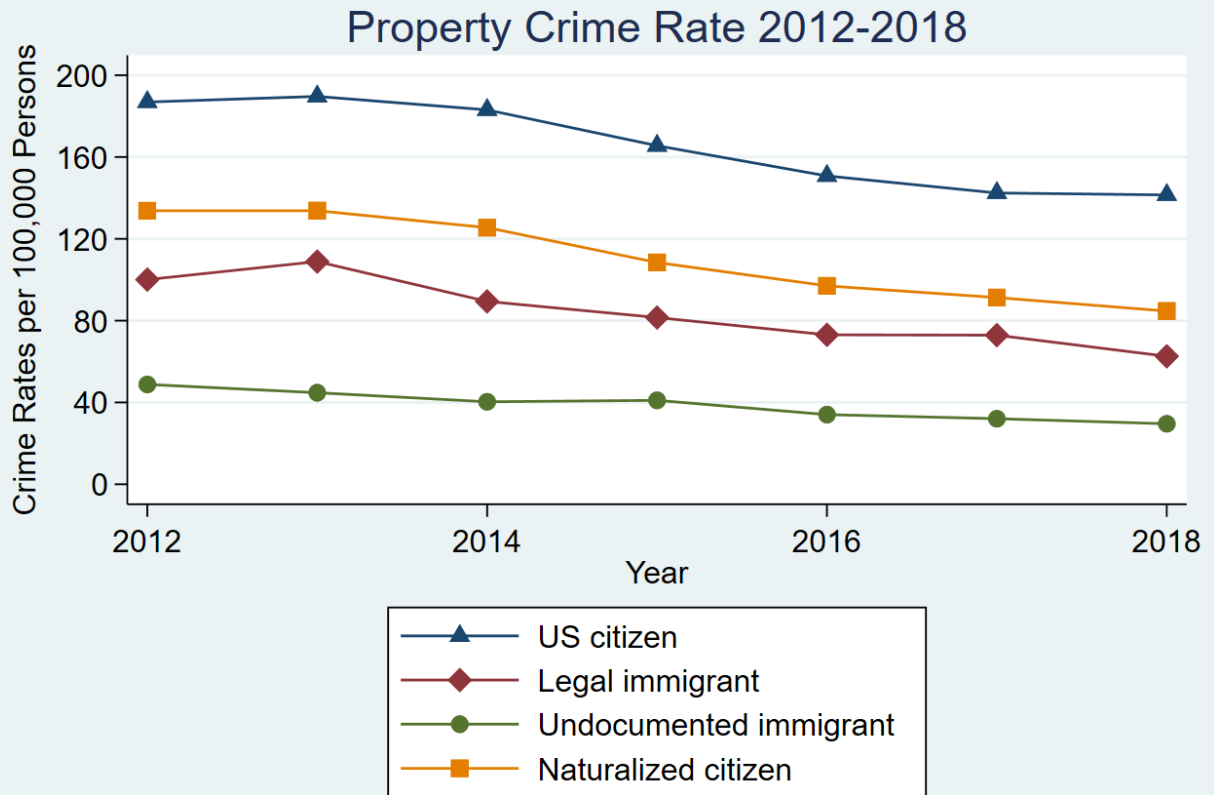

Source: Texas CCH. All crimes are felonies.

Figure S23. Trends of drug crime rates by native-born U.S. citizens, naturalized U.S. citizens, legal immigrants and undocumented immigrants

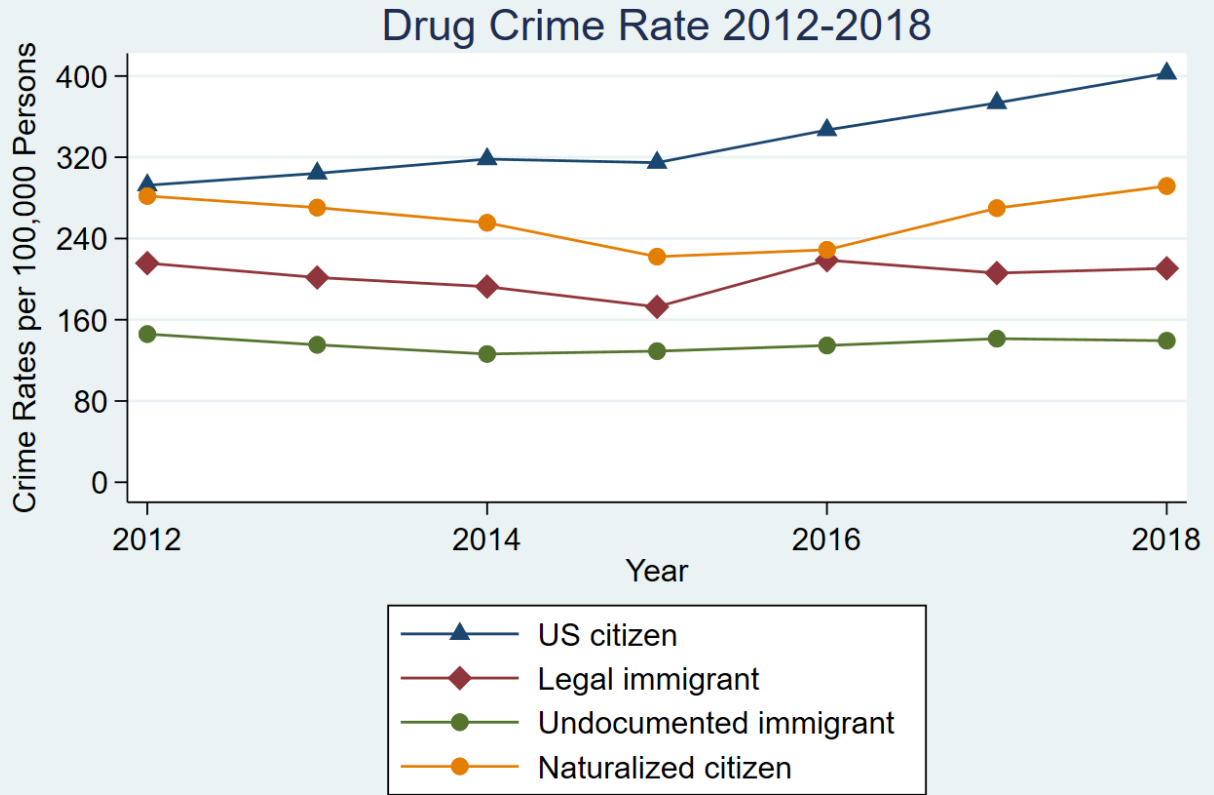

Source: Texas CCH. All crimes are felonies.

Figure S24. Trends of traffic crime rates by native-born U.S. citizens, naturalized U.S. citizens, legal immigrants and undocumented immigrants

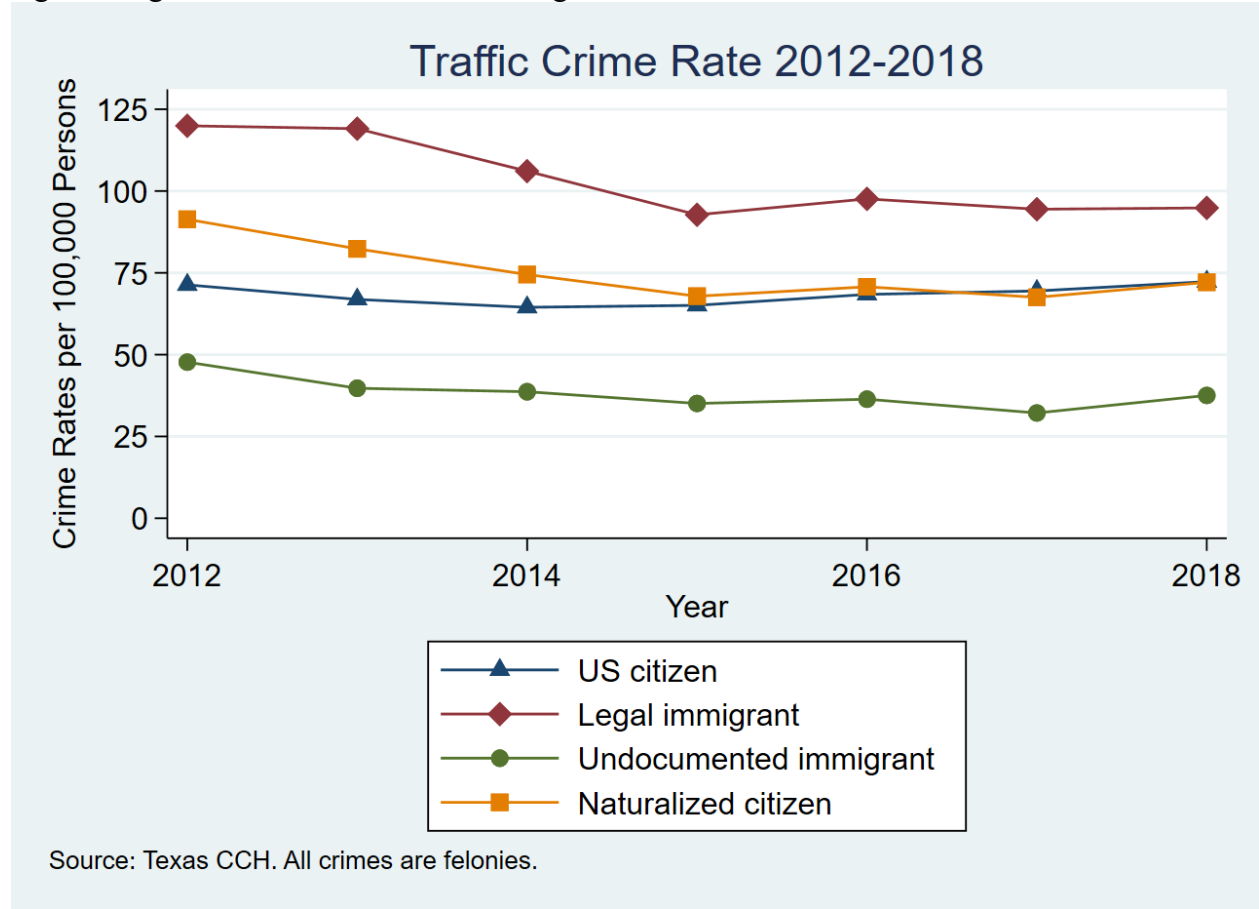

Section VIII. *Untransformed trends analyses*

Table S8. Trends in the undocumented percentage of arrest charges: Augmented Dickey-Fuller Time-Series test and linear trend test results

| <b>Undocumented percentage</b> | <b>Estimated value</b> | <b>Trend</b> | <b>Type</b> | <b>Number of lag terms</b> |
|--------------------------------|------------------------|--------------|-------------|----------------------------|
| <b>ADF test</b>                |                        |              |             |                            |
| Total Felony                   | -0.006                 | Trendless    | Random walk | 3                          |
| Violent                        | -0.002                 | Trendless    | Stationary  | 0                          |
| Property                       | -0.003*                | Decrease     | Stationary  | 0                          |
| Drug                           | -0.009*                | Decrease     | Random walk | 3                          |
| Traffic                        | -0.010**               | Decrease     | Stationary  | 1                          |
| <b>Linear trend Test</b>       |                        |              |             |                            |
| Total Felony                   | -0.006***              | Decrease     |             |                            |
| Violent                        | -0.002                 | Trendless    |             |                            |
| Property                       | -0.004**               | Decrease     |             |                            |
| Drug                           | -0.011***              | Decrease     |             |                            |
| Traffic                        | -0.013***              | Decrease     |             |                            |

\*  $p < 0.05$ , \*\*  $p < 0.01$ , \*\*\*  $p < 0.001$

Table S9. ADF tests of the percentage of undocumented immigrant arrests

|                          | Total Felony | Violent   | Property  | Drug     | Traffic   |
|--------------------------|--------------|-----------|-----------|----------|-----------|
| L.Percent Undocumented   | -0.933*      | -0.833*** | -0.916*** | -0.734** | -0.765*** |
|                          | (-2.61)      | (-7.28)   | (-8.08)   | (-2.90)  | (-5.14)   |
| LD.Percent Undocumented  | -0.083       |           |           | -0.275   | 0.044     |
|                          | (-0.26)      |           |           | (-1.20)  | (0.36)    |
| L2D.Percent Undocumented | -0.043       |           |           | -0.144   |           |
|                          | (-0.17)      |           |           | (-0.74)  |           |
| L3D.Percent Undocumented | -0.007       |           |           | 0.0562   |           |
|                          | (-0.04)      |           |           | (0.37)   |           |
| Trend                    | -0.006       | -0.002    | -0.003*   | -0.009*  | -0.010**  |
|                          | (-1.98)      | (-1.52)   | (-2.15)   | (-2.60)  | (-2.89)   |
| Constant                 | 2.696*       | 2.569***  | 1.577***  | 2.425**  | 3.109***  |
|                          | (2.55)       | (7.13)    | (7.57)    | (2.91)   | (4.95)    |
| <i>N</i>                 | 56           | 77        | 77        | 56       | 70        |

*t* statistics in parentheses

\*  $p < 0.05$ , \*\*  $p < 0.01$ , \*\*\*  $p < 0.001$

Table S10. Linear trend tests of the percentage of undocumented immigrant arrest

|                        | Total felony          | Violent              | Property             | Drug                  | Traffic               |
|------------------------|-----------------------|----------------------|----------------------|-----------------------|-----------------------|
| Month                  | -0.006 <sup>***</sup> | -0.002               | -0.004 <sup>**</sup> | -0.011 <sup>***</sup> | -0.013 <sup>***</sup> |
| Indicator ( <i>t</i> ) | (-7.75)               | (-1.74)              | (-2.89)              | (-8.18)               | (-4.94)               |
| Constant               | 2.904 <sup>**</sup>   | 3.065 <sup>***</sup> | 1.749 <sup>***</sup> | 3.229 <sup>***</sup>  | 4.018 <sup>***</sup>  |
|                        | (74.37)               | (45.54)              | (29.01)              | (48.94)               | (32.22)               |
| N                      | 84                    | 84                   | 84                   | 84                    | 84                    |

*t* statistics in parentheses

\*  $p < 0.05$ , \*\*  $p < 0.01$ , \*\*\*  $p < 0.001$
